# Supplementary material
Source: publisher figshare collection journal article supplement (https://acs.figshare.com/ndownloader/files/4593901)
Supplement: Supplementary file 1 [file 4593901]

data_mobses10

 

_audit_creation_method            SHELXL-97

_chemical_name_systematic

;

 ?

;

_chemical_name_common             ?

_chemical_melting_point           ?

_chemical_formula_moiety          ?

_chemical_formula_sum

 'C20 H42 Mo P4 Se'

_chemical_formula_weight          581.32

 

loop_

 _atom_type_symbol

 _atom_type_description

 _atom_type_scat_dispersion_real

 _atom_type_scat_dispersion_imag

 _atom_type_scat_source

 'C'  'C'   0.0033   0.0016

 'International Tables Vol C Tables 4.2.6.8 and 6.1.1.4'

 'H'  'H'   0.0000   0.0000

 'International Tables Vol C Tables 4.2.6.8 and 6.1.1.4'

 'P'  'P'   0.1023   0.0942

 'International Tables Vol C Tables 4.2.6.8 and 6.1.1.4'

 'Se'  'Se'  -0.0929   2.2259

 'International Tables Vol C Tables 4.2.6.8 and 6.1.1.4'

 'Mo'  'Mo'  -1.6832   0.6857

 'International Tables Vol C Tables 4.2.6.8 and 6.1.1.4'

 

_symmetry_cell_setting            Orthorhombic

_symmetry_space_group_name_H-M    Pbca

 

loop_

 _symmetry_equiv_pos_as_xyz

 'x, y, z'

 '-x+1/2, -y, z+1/2'

 '-x, y+1/2, -z+1/2'

 'x+1/2, -y+1/2, -z'

 '-x, -y, -z'

 'x-1/2, y, -z-1/2'

 'x, -y-1/2, z-1/2'

 '-x-1/2, y-1/2, z'

 

_cell_length_a                    15.3325(9)

_cell_length_b                    17.6221(10)

_cell_length_c                    19.5080(11)

_cell_angle_alpha                 90.00

_cell_angle_beta                  90.00

_cell_angle_gamma                 90.00

_cell_volume                      5270.9(5)

_cell_formula_units_Z             8

_cell_measurement_temperature     125(2)

_cell_measurement_reflns_used     9961

_cell_measurement_theta_min       2.31

_cell_measurement_theta_max       30.43

 

_exptl_crystal_description        BLOCK

_exptl_crystal_colour             'DARK RED'

_exptl_crystal_size_max           0.20

_exptl_crystal_size_mid           0.16

_exptl_crystal_size_min           0.10

_exptl_crystal_density_meas       ?

_exptl_crystal_density_diffrn     1.465

_exptl_crystal_density_method     'not measured'

_exptl_crystal_F_000              2384

_exptl_absorpt_coefficient_mu     2.126

_exptl_absorpt_correction_type    EMPIRICAL

_exptl_absorpt_correction_T_min   0.6758

_exptl_absorpt_correction_T_max   0.8155

_exptl_absorpt_process_details    sadabs

 

_exptl_special_details

;

 ?

;

 

_diffrn_ambient_temperature       125(2)

_diffrn_radiation_wavelength      0.71073

_diffrn_radiation_type            MoK\a

_diffrn_radiation_source          'fine-focus sealed tube'

_diffrn_radiation_monochromator   graphite

_diffrn_measurement_device_type   'CCD area detector'

_diffrn_measurement_method        'phi and omega scans'

_diffrn_detector_area_resol_mean  ?

_diffrn_standards_number          ?

_diffrn_standards_interval_count  ?

_diffrn_standards_interval_time   ?

_diffrn_standards_decay_%         ?

_diffrn_reflns_number             86226

_diffrn_reflns_av_R_equivalents   0.0635

_diffrn_reflns_av_sigmaI/netI     0.0369

_diffrn_reflns_limit_h_min        -22

_diffrn_reflns_limit_h_max        22

_diffrn_reflns_limit_k_min        -26

_diffrn_reflns_limit_k_max        25

_diffrn_reflns_limit_l_min        -28

_diffrn_reflns_limit_l_max        28

_diffrn_reflns_theta_min          2.05

_diffrn_reflns_theta_max          31.92

_reflns_number_total              9050

_reflns_number_gt                 6328

_reflns_threshold_expression      >2sigma(I)

 

_computing_data_collection        'Bruker SMART'

_computing_cell_refinement        'Bruker SMART'

_computing_data_reduction         'Bruker SAINT'

_computing_structure_solution     'SHELXS-97 (Sheldrick, 1990)'

_computing_structure_refinement   'SHELXL-97 (Sheldrick, 1997)'

_computing_molecular_graphics     'Bruker SHELXTL'

_computing_publication_material   'Bruker SHELXTL'

 

_refine_special_details

;

 Refinement of F^2^ against ALL reflections.  The weighted R-factor wR and

 goodness of fit S are based on F^2^, conventional R-factors R are based

 on F, with F set to zero for negative F^2^. The threshold expression of

 F^2^ > 2sigma(F^2^) is used only for calculating R-factors(gt) etc. and is

 not relevant to the choice of reflections for refinement.  R-factors based

 on F^2^ are statistically about twice as large as those based on F, and R-

 factors based on ALL data will be even larger.

;

 

_refine_ls_structure_factor_coef  Fsqd

_refine_ls_matrix_type            full

_refine_ls_weighting_scheme       calc

_refine_ls_weighting_details

 'calc w=1/[\s^2^(Fo^2^)+(0.0559P)^2^+8.0091P] where P=(Fo^2^+2Fc^2^)/3'

_atom_sites_solution_primary      direct

_atom_sites_solution_secondary    difmap

_atom_sites_solution_hydrogens    geom

_refine_ls_hydrogen_treatment     mixed

_refine_ls_extinction_method      none

_refine_ls_extinction_coef        ?

_refine_ls_number_reflns          9050

_refine_ls_number_parameters      243

_refine_ls_number_restraints      3

_refine_ls_R_factor_all           0.0774

_refine_ls_R_factor_gt            0.0436

_refine_ls_wR_factor_ref          0.1203

_refine_ls_wR_factor_gt           0.1017

_refine_ls_goodness_of_fit_ref    1.048

_refine_ls_restrained_S_all       1.048

_refine_ls_shift/su_max           0.001

_refine_ls_shift/su_mean          0.000

 

loop_

 _atom_site_label

 _atom_site_type_symbol

 _atom_site_fract_x

 _atom_site_fract_y

 _atom_site_fract_z

 _atom_site_U_iso_or_equiv

 _atom_site_adp_type

 _atom_site_occupancy

 _atom_site_symmetry_multiplicity

 _atom_site_calc_flag

 _atom_site_refinement_flags

 _atom_site_disorder_assembly

 _atom_site_disorder_group

Mo Mo 0.597823(15) 0.171849(15) 0.357030(12) 0.02068(7) Uani 1 1 d . . .

Se Se 0.60982(2) 0.12157(3) 0.487977(18) 0.03967(11) Uani 1 1 d . . .

P1 P 0.63250(6) 0.30135(5) 0.39552(4) 0.03081(18) Uani 1 1 d . . .

C1 C 0.72008(19) 0.14134(18) 0.36962(15) 0.0259(6) Uani 1 1 d D . .

P2 P 0.56279(6) 0.04192(5) 0.31811(5) 0.03387(19) Uani 1 1 d . . .

C2 C 0.7304(2) 0.1642(2) 0.30219(16) 0.0303(7) Uani 1 1 d D . .

H1 H 0.761(3) 0.2114(16) 0.3018(19) 0.061(14) Uiso 1 1 d D . .

H2 H 0.742(3) 0.1214(16) 0.2752(15) 0.061(14) Uiso 1 1 d D . .

P3 P 0.44144(5) 0.18559(5) 0.40929(4) 0.02384(16) Uani 1 1 d . . .

C3 C 0.77150(19) 0.10882(17) 0.42351(15) 0.0247(6) Uani 1 1 d . . .

P4 P 0.57326(5) 0.22043(5) 0.23931(4) 0.02519(16) Uani 1 1 d . . .

C4 C 0.8611(2) 0.09188(18) 0.41733(17) 0.0296(6) Uani 1 1 d . . .

H4A H 0.8907 0.1017 0.3755 0.036 Uiso 1 1 calc R . .

C5 C 0.9056(2) 0.0609(2) 0.47213(19) 0.0355(7) Uani 1 1 d . . .

H5A H 0.9660 0.0497 0.4682 0.043 Uiso 1 1 calc R . .

C6 C 0.8616(2) 0.0463(2) 0.53343(18) 0.0343(7) Uani 1 1 d . . .

H6A H 0.8927 0.0246 0.5707 0.041 Uiso 1 1 calc R . .

C7 C 0.7742(2) 0.0627(2) 0.54117(18) 0.0331(7) Uani 1 1 d . . .

H7A H 0.7453 0.0526 0.5833 0.040 Uiso 1 1 calc R . .

C8 C 0.7282(2) 0.09454(19) 0.48559(16) 0.0281(6) Uani 1 1 d . . .

C11 C 0.6477(3) 0.3187(3) 0.48717(19) 0.0576(13) Uani 1 1 d . . .

H11A H 0.6611 0.3724 0.4946 0.086 Uiso 1 1 calc R . .

H11B H 0.6960 0.2875 0.5042 0.086 Uiso 1 1 calc R . .

H11C H 0.5941 0.3054 0.5118 0.086 Uiso 1 1 calc R . .

C12 C 0.5556(3) 0.3778(2) 0.3756(2) 0.0424(9) Uani 1 1 d . . .

H12A H 0.5778 0.4258 0.3939 0.064 Uiso 1 1 calc R . .

H12B H 0.4989 0.3665 0.3964 0.064 Uiso 1 1 calc R . .

H12C H 0.5489 0.3820 0.3258 0.064 Uiso 1 1 calc R . .

C13 C 0.7358(3) 0.3429(3) 0.3666(2) 0.0460(10) Uani 1 1 d . . .

H13A H 0.7418 0.3942 0.3854 0.069 Uiso 1 1 calc R . .

H13B H 0.7365 0.3452 0.3164 0.069 Uiso 1 1 calc R . .

H13C H 0.7845 0.3114 0.3826 0.069 Uiso 1 1 calc R . .

C21 C 0.4617(3) 0.0244(2) 0.2694(2) 0.0524(11) Uani 1 1 d . . .

H21A H 0.4576 -0.0296 0.2580 0.079 Uiso 1 1 calc R . .

H21B H 0.4625 0.0544 0.2271 0.079 Uiso 1 1 calc R . .

H21C H 0.4113 0.0391 0.2972 0.079 Uiso 1 1 calc R . .

C22 C 0.6433(3) -0.0053(2) 0.2624(2) 0.0501(11) Uani 1 1 d . . .

H22A H 0.6223 -0.0561 0.2505 0.075 Uiso 1 1 calc R . .

H22B H 0.6990 -0.0094 0.2867 0.075 Uiso 1 1 calc R . .

H22C H 0.6513 0.0246 0.2205 0.075 Uiso 1 1 calc R . .

C23 C 0.5572(3) -0.0329(2) 0.3829(2) 0.0539(11) Uani 1 1 d . . .

H23A H 0.5429 -0.0813 0.3608 0.081 Uiso 1 1 calc R . .

H23B H 0.5120 -0.0204 0.4166 0.081 Uiso 1 1 calc R . .

H23C H 0.6137 -0.0373 0.4060 0.081 Uiso 1 1 calc R . .

C31 C 0.3828(2) 0.0982(2) 0.4313(2) 0.0428(9) Uani 1 1 d . . .

H31A H 0.3255 0.1110 0.4502 0.064 Uiso 1 1 calc R . .

H31B H 0.4163 0.0696 0.4654 0.064 Uiso 1 1 calc R . .

H31C H 0.3753 0.0672 0.3900 0.064 Uiso 1 1 calc R . .

C32 C 0.4310(2) 0.2347(2) 0.49130(17) 0.0379(8) Uani 1 1 d . . .

H32A H 0.3696 0.2359 0.5050 0.057 Uiso 1 1 calc R . .

H32B H 0.4529 0.2867 0.4867 0.057 Uiso 1 1 calc R . .

H32C H 0.4651 0.2078 0.5262 0.057 Uiso 1 1 calc R . .

C33 C 0.3546(2) 0.2347(2) 0.36261(19) 0.0406(8) Uani 1 1 d . . .

H33A H 0.3011 0.2342 0.3900 0.061 Uiso 1 1 calc R . .

H33B H 0.3442 0.2090 0.3188 0.061 Uiso 1 1 calc R . .

H33C H 0.3722 0.2874 0.3540 0.061 Uiso 1 1 calc R . .

C41 C 0.6349(2) 0.3019(2) 0.20684(18) 0.0358(7) Uani 1 1 d . . .

H41A H 0.6166 0.3130 0.1598 0.054 Uiso 1 1 calc R . .

H41B H 0.6973 0.2901 0.2075 0.054 Uiso 1 1 calc R . .

H41C H 0.6236 0.3462 0.2359 0.054 Uiso 1 1 calc R . .

C42 C 0.5932(3) 0.1579(2) 0.16557(17) 0.0425(9) Uani 1 1 d . . .

H42A H 0.5805 0.1854 0.1231 0.064 Uiso 1 1 calc R . .

H42B H 0.5554 0.1133 0.1688 0.064 Uiso 1 1 calc R . .

H42C H 0.6544 0.1418 0.1656 0.064 Uiso 1 1 calc R . .

C43 C 0.4639(2) 0.2539(2) 0.21307(18) 0.0380(8) Uani 1 1 d . . .

H43A H 0.4658 0.2710 0.1653 0.057 Uiso 1 1 calc R . .

H43B H 0.4460 0.2961 0.2426 0.057 Uiso 1 1 calc R . .

H43C H 0.4218 0.2122 0.2175 0.057 Uiso 1 1 calc R . .

 

loop_

 _atom_site_aniso_label

 _atom_site_aniso_U_11

 _atom_site_aniso_U_22

 _atom_site_aniso_U_33

 _atom_site_aniso_U_23

 _atom_site_aniso_U_13

 _atom_site_aniso_U_12

Mo 0.01635(10) 0.02974(13) 0.01597(11) 0.00427(9) -0.00047(8) 0.00065(9)

Se 0.02245(15) 0.0708(3) 0.02576(17) 0.01968(16) 0.00061(12) 0.00249(15)

P1 0.0268(4) 0.0425(5) 0.0231(4) -0.0050(3) 0.0024(3) -0.0114(3)

C1 0.0213(12) 0.0317(15) 0.0249(14) 0.0015(12) -0.0008(11) 0.0011(11)

P2 0.0389(5) 0.0262(4) 0.0366(5) 0.0040(3) 0.0053(4) 0.0042(3)

C2 0.0253(14) 0.0404(18) 0.0252(14) -0.0012(13) 0.0110(11) -0.0038(13)

P3 0.0174(3) 0.0319(4) 0.0223(3) 0.0022(3) 0.0006(3) -0.0012(3)

C3 0.0220(13) 0.0238(14) 0.0283(14) 0.0002(11) -0.0061(11) 0.0008(11)

P4 0.0287(4) 0.0305(4) 0.0164(3) 0.0028(3) -0.0004(3) 0.0043(3)

C4 0.0274(15) 0.0310(16) 0.0304(15) -0.0051(13) -0.0029(12) 0.0053(12)

C5 0.0288(16) 0.0367(18) 0.0411(18) -0.0059(15) -0.0107(13) 0.0133(13)

C6 0.0317(16) 0.0337(17) 0.0374(17) 0.0039(14) -0.0150(14) 0.0036(13)

C7 0.0319(16) 0.0365(18) 0.0310(16) 0.0053(13) -0.0089(13) -0.0022(13)

C8 0.0217(13) 0.0334(16) 0.0293(15) 0.0046(12) -0.0049(11) -0.0011(11)

C11 0.052(2) 0.095(4) 0.0255(17) -0.015(2) -0.0001(16) -0.033(2)

C12 0.046(2) 0.0360(19) 0.045(2) -0.0110(16) 0.0094(17) -0.0056(16)

C13 0.0364(19) 0.058(2) 0.043(2) -0.0046(18) 0.0057(16) -0.0223(17)

C21 0.056(2) 0.044(2) 0.057(3) -0.0141(19) -0.007(2) -0.0129(19)

C22 0.065(3) 0.0333(19) 0.052(2) -0.0001(17) 0.017(2) 0.0144(18)

C23 0.066(3) 0.033(2) 0.063(3) 0.0173(19) 0.020(2) 0.0075(19)

C31 0.0306(17) 0.040(2) 0.058(2) 0.0044(18) 0.0143(16) -0.0071(14)

C32 0.0319(16) 0.055(2) 0.0269(16) -0.0053(15) 0.0071(13) -0.0030(15)

C33 0.0252(15) 0.060(2) 0.0366(18) 0.0078(17) 0.0001(13) 0.0101(15)

C41 0.0359(17) 0.0422(19) 0.0294(16) 0.0101(14) 0.0072(13) 0.0030(15)

C42 0.056(2) 0.054(2) 0.0171(14) -0.0029(14) -0.0004(14) 0.0117(18)

C43 0.0331(17) 0.052(2) 0.0286(16) 0.0067(15) -0.0051(13) 0.0075(15)

 

_geom_special_details

;

 All esds (except the esd in the dihedral angle between two l.s. planes)

 are estimated using the full covariance matrix.  The cell esds are taken

 into account individually in the estimation of esds in distances, angles

 and torsion angles; correlations between esds in cell parameters are only

 used when they are defined by crystal symmetry.  An approximate (isotropic)

 treatment of cell esds is used for estimating esds involving l.s. planes.

;

 

loop_

 _geom_bond_atom_site_label_1

 _geom_bond_atom_site_label_2

 _geom_bond_distance

 _geom_bond_site_symmetry_2

 _geom_bond_publ_flag

Mo C1 1.965(3) . ?

Mo C2 2.301(3) . ?

Mo P1 2.4605(9) . ?

Mo P2 2.4714(10) . ?

Mo P4 2.4796(8) . ?

Mo P3 2.6168(8) . ?

Mo Se 2.7101(4) . ?

Se C8 1.876(3) . ?

P1 C11 1.829(4) . ?

P1 C12 1.833(4) . ?

P1 C13 1.834(4) . ?

C1 C2 1.385(4) . ?

C1 C3 1.434(4) . ?

P2 C23 1.829(4) . ?

P2 C22 1.842(4) . ?

P2 C21 1.844(4) . ?

C2 H2 0.936(18) . ?

C2 H1 0.954(18) . ?

P3 C32 1.826(3) . ?

P3 C33 1.831(3) . ?

P3 C31 1.835(4) . ?

C3 C8 1.404(4) . ?

C3 C4 1.410(4) . ?

P4 C41 1.832(4) . ?

P4 C42 1.837(4) . ?

P4 C43 1.850(3) . ?

C4 C5 1.381(5) . ?

C5 C6 1.397(5) . ?

C6 C7 1.380(5) . ?

C7 C8 1.410(4) . ?

 

loop_

 _geom_angle_atom_site_label_1

 _geom_angle_atom_site_label_2

 _geom_angle_atom_site_label_3

 _geom_angle

 _geom_angle_site_symmetry_1

 _geom_angle_site_symmetry_3

 _geom_angle_publ_flag

C1 Mo C2 36.83(12) . . ?

C1 Mo P1 90.55(10) . . ?

C2 Mo P1 90.30(9) . . ?

C1 Mo P2 89.55(10) . . ?

C2 Mo P2 89.71(9) . . ?

P1 Mo P2 179.85(4) . . ?

C1 Mo P4 110.80(9) . . ?

C2 Mo P4 73.97(9) . . ?

P1 Mo P4 89.73(3) . . ?

P2 Mo P4 90.13(3) . . ?

C1 Mo P3 148.27(9) . . ?

C2 Mo P3 174.90(9) . . ?

P1 Mo P3 89.61(3) . . ?

P2 Mo P3 90.36(3) . . ?

P4 Mo P3 100.93(3) . . ?

C1 Mo Se 74.22(9) . . ?

C2 Mo Se 111.04(9) . . ?

P1 Mo Se 90.05(2) . . ?

P2 Mo Se 90.08(2) . . ?

P4 Mo Se 174.98(2) . . ?

P3 Mo Se 74.050(19) . . ?

C8 Se Mo 97.19(10) . . ?

C11 P1 C12 99.6(2) . . ?

C11 P1 C13 97.12(19) . . ?

C12 P1 C13 101.4(2) . . ?

C11 P1 Mo 118.73(17) . . ?

C12 P1 Mo 118.56(13) . . ?

C13 P1 Mo 117.57(14) . . ?

C2 C1 C3 138.6(3) . . ?

C2 C1 Mo 84.9(2) . . ?

C3 C1 Mo 136.5(2) . . ?

C23 P2 C22 96.50(19) . . ?

C23 P2 C21 101.3(2) . . ?

C22 P2 C21 100.6(2) . . ?

C23 P2 Mo 117.79(17) . . ?

C22 P2 Mo 116.99(15) . . ?

C21 P2 Mo 119.74(14) . . ?

H2 C2 H1 127(4) . . ?

H2 C2 C1 109(2) . . ?

H1 C2 C1 109(2) . . ?

H2 C2 Mo 119(3) . . ?

H1 C2 Mo 113(3) . . ?

C1 C2 Mo 58.29(16) . . ?

C32 P3 C33 98.53(18) . . ?

C32 P3 C31 98.64(19) . . ?

C33 P3 C31 99.06(19) . . ?

C32 P3 Mo 117.72(12) . . ?

C33 P3 Mo 121.08(12) . . ?

C31 P3 Mo 117.54(13) . . ?

C8 C3 C4 119.8(3) . . ?

C8 C3 C1 116.3(3) . . ?

C4 C3 C1 123.9(3) . . ?

C41 P4 C42 96.50(18) . . ?

C41 P4 C43 97.03(17) . . ?

C42 P4 C43 97.18(18) . . ?

C41 P4 Mo 120.83(12) . . ?

C42 P4 Mo 119.53(13) . . ?

C43 P4 Mo 120.26(12) . . ?

C5 C4 C3 120.0(3) . . ?

C4 C5 C6 119.8(3) . . ?

C7 C6 C5 121.6(3) . . ?

C6 C7 C8 119.0(3) . . ?

C3 C8 C7 119.9(3) . . ?

C3 C8 Se 115.7(2) . . ?

C7 C8 Se 124.4(3) . . ?

 

_diffrn_measured_fraction_theta_max    0.997

_diffrn_reflns_theta_full              31.92

_diffrn_measured_fraction_theta_full   0.997

_refine_diff_density_max    2.120

_refine_diff_density_min   -0.991

_refine_diff_density_rms    0.132
